# Supplementary figures and images for: Heat to Hydrogen by Reverse Electrodialysis—Using a Non-Equilibrium Thermodynamics Model to Evaluate Hydrogen Production Concepts Utilising Waste Heat
Source: MDPI journal article supplement (doi:10.3390/en15166011), 2022-08-19

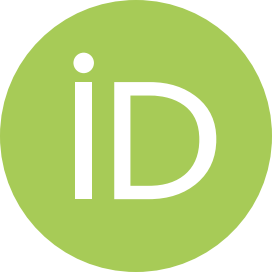

Supplement: s1 [file s1]
